# Supplementary material for: Energy-efficient production of plasma-activated water: insights into controllable peroxynitrite chemistry
Source: Royal Society of Chemistry journal article supplement (doi:10.1039/d5gc00080g), 2025-01-01
Supplement: d5gc00080g1.pdf [file d5gc00080g1.pdf]

**Supplementary Information**  
**Energy-efficient Production of Plasma-Activated Water:**  
**Insights into Controllable Peroxynitrite Chemistry**

Dingwei Gan<sup>a</sup>, Longfei Hong<sup>a</sup>, Shuai Yuan<sup>a</sup>, Mengying Zhu<sup>a</sup>, Yuting Gao<sup>a</sup>, Tianqi Zhang<sup>b</sup>, Tianyu Li<sup>a</sup>, Bohan Chen<sup>a</sup>, Anna Dzimitrowicz<sup>c</sup>, Piotr Jamroz<sup>c</sup>, Patrick J. Cullen<sup>b</sup>, Renwu Zhou<sup>a\*</sup>

*a. State Key Laboratory of Electrical Insulation and Power Equipment, Centre for Plasma Biomedicine, School of Electrical Engineering, Xi'an JiaoTong University, Xi'an 710049, China.*

*b. Chemical and Biomolecular Engineering, The University of Sydney, City Road Sydney, Sydney, New South Wales 2006, Australia.*

*c. Department of Analytical Chemistry and Chemical Metallurgy, Faculty of Chemistry, Wrocław University of Science and Technology, 27 Wybrzeże Stanisława Wyspińskiego, 50-370 Wrocław, Poland.*

\*Corresponding author: [renwu.zhou@xjtu.edu.cn](mailto:renwu.zhou@xjtu.edu.cn)

**This supplementary information contains the following sections:**

- S1.** Discharge waveform (**Fig. S1-S5**)
- S2.** Discharge plasma platform (**Fig. S6**)
- S3.** Detection of RONS in the liquid (**Fig. S7-S9**)
- S4.** Supplementary Figures (**Fig. S10-S24**)

S1. Discharge waveform

DR Ar: N<sub>2</sub>=1:3

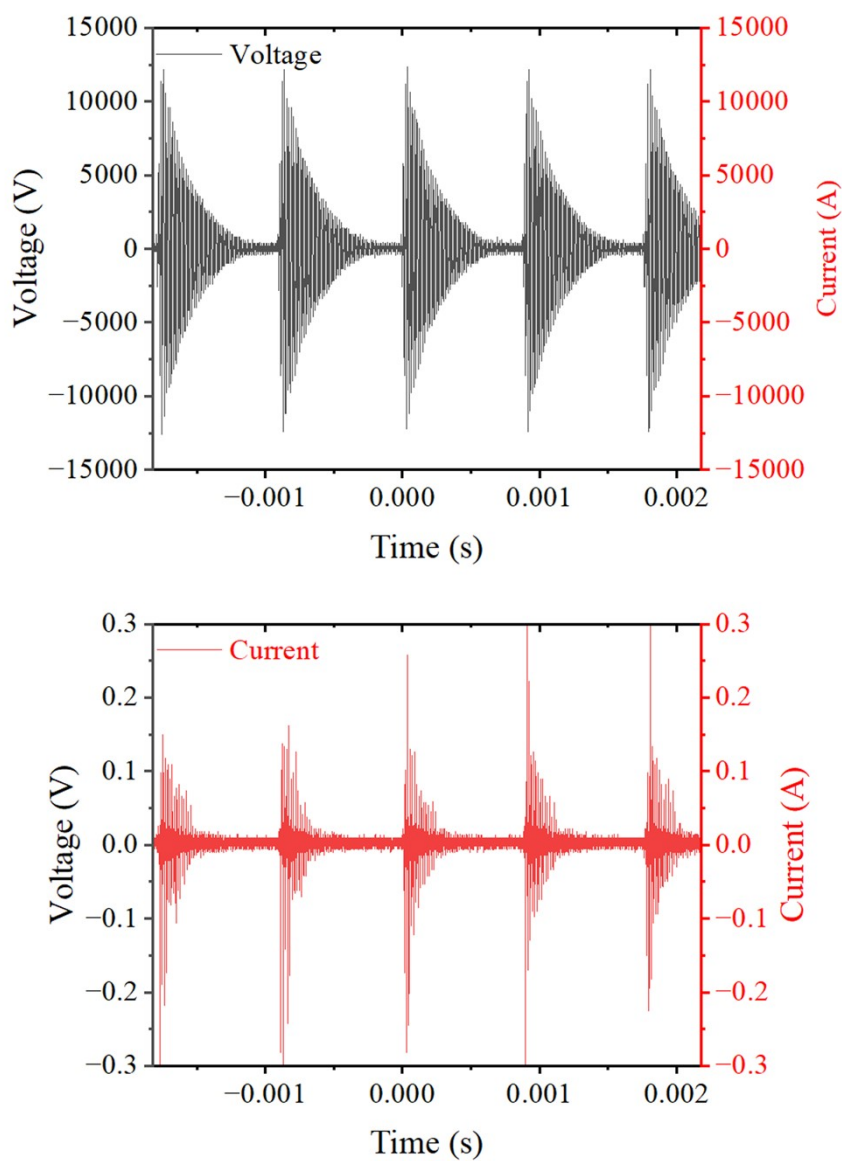

**Fig. S1** The discharge waveform of DR (Ar : N<sub>2</sub>=1:3).

## DR Ar: N<sub>2</sub>=2:2

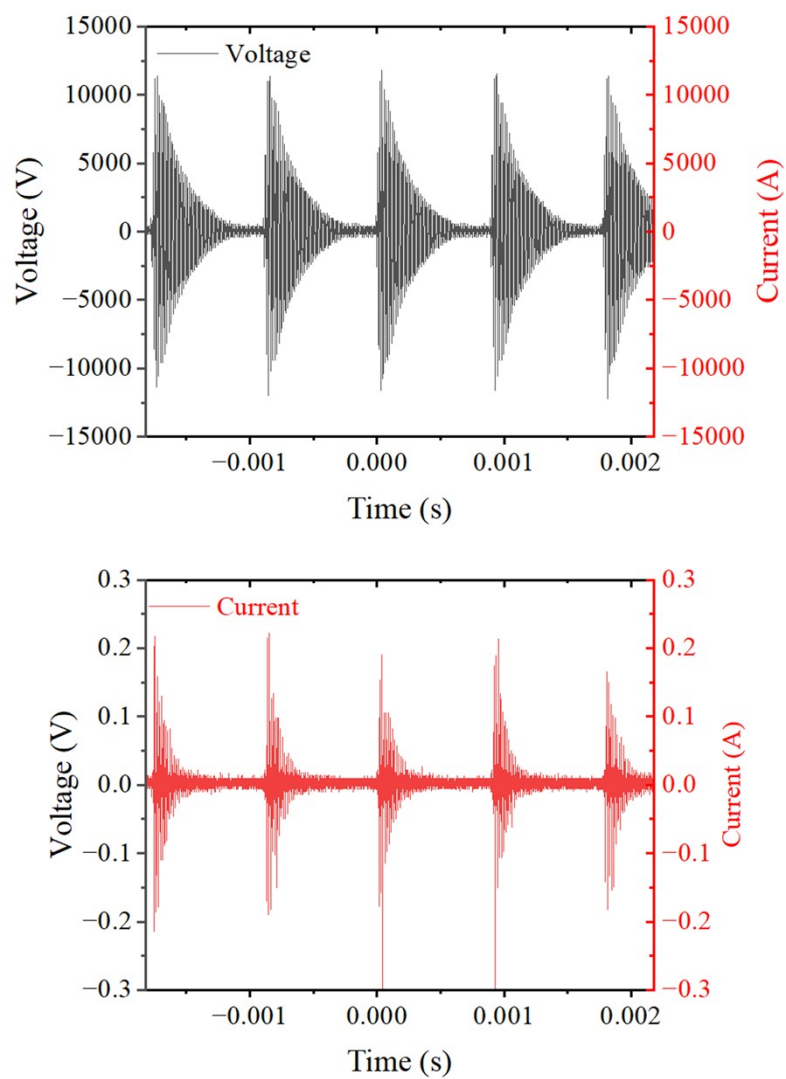

**Fig. S2** The discharge waveform of DR (Ar : N<sub>2</sub>=2:2).

# DR Ar: N<sub>2</sub>=3:1

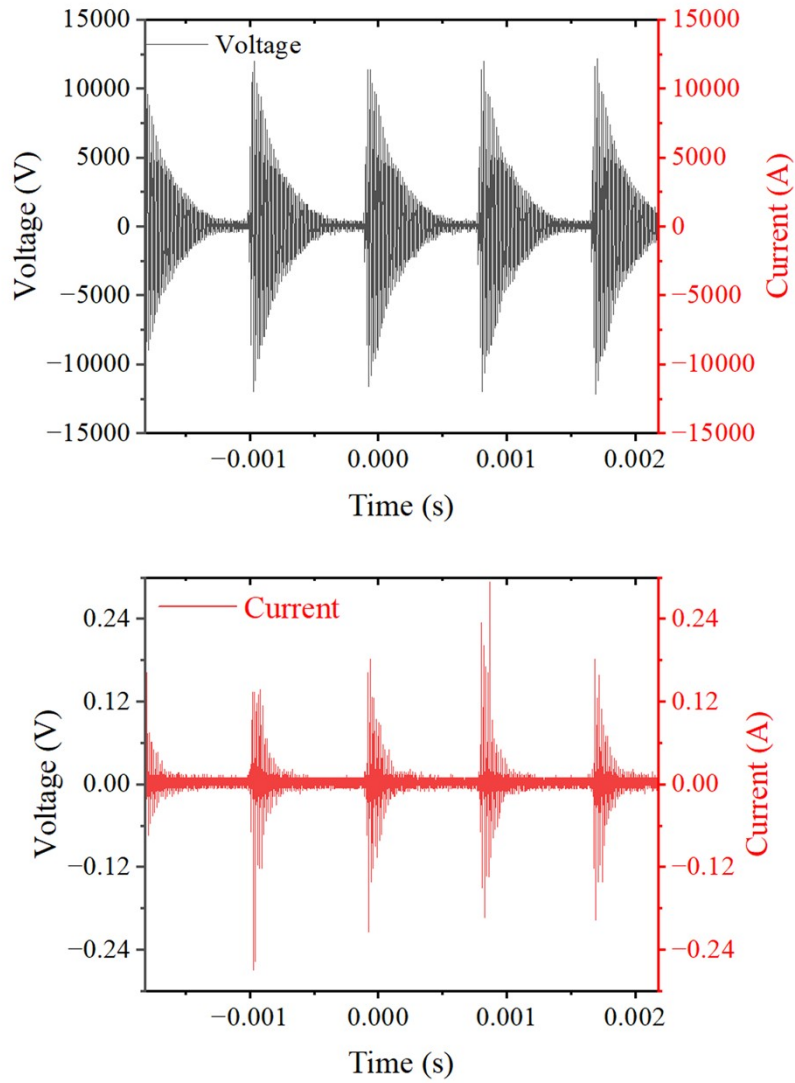

**Fig. S3** The discharge waveform of DR (Ar : N<sub>2</sub>=3:1).

# DR Ar: N<sub>2</sub>=4:0

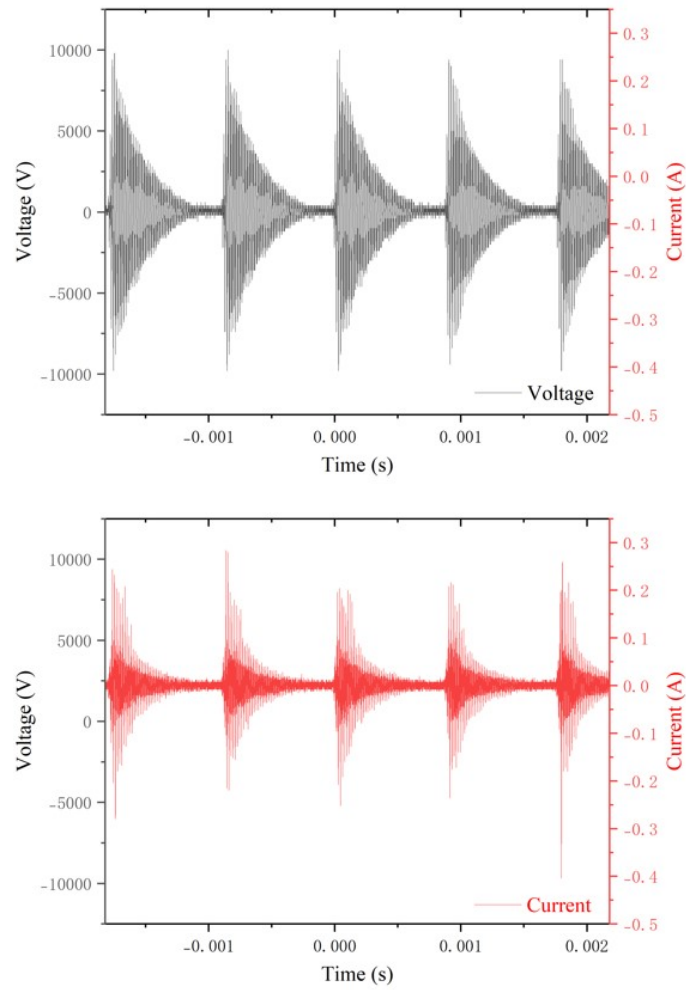

**Fig. S4** The discharge waveform of DR (Ar : N<sub>2</sub>=4:0).

# DR Ar: N<sub>2</sub>=0:4

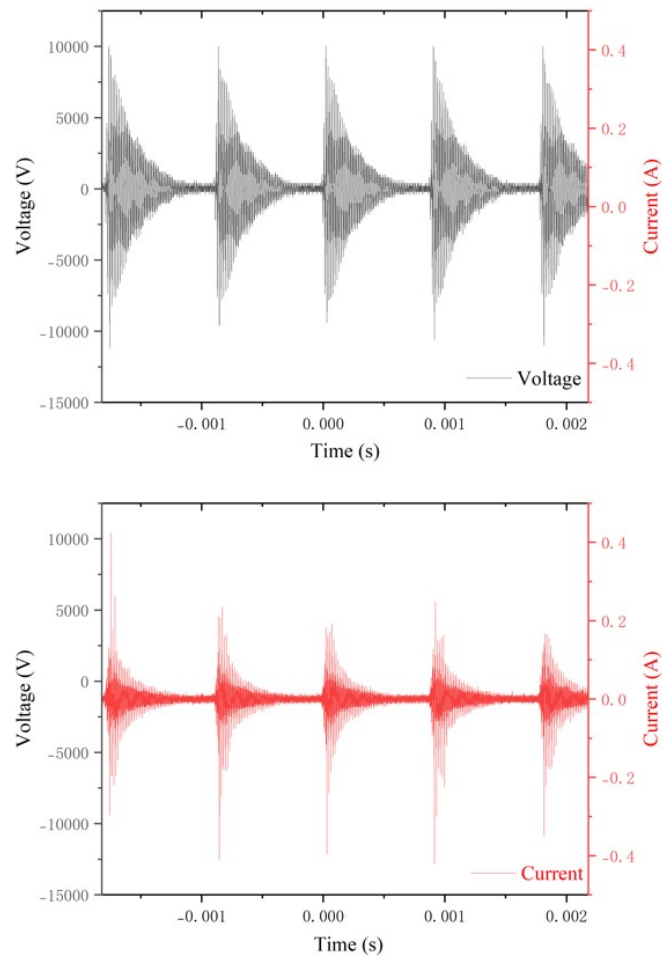

**Fig. S5** The discharge waveform of DR (Ar : N<sub>2</sub>=0:4).

## S2. Discharge plasma platform (Fig. S6)

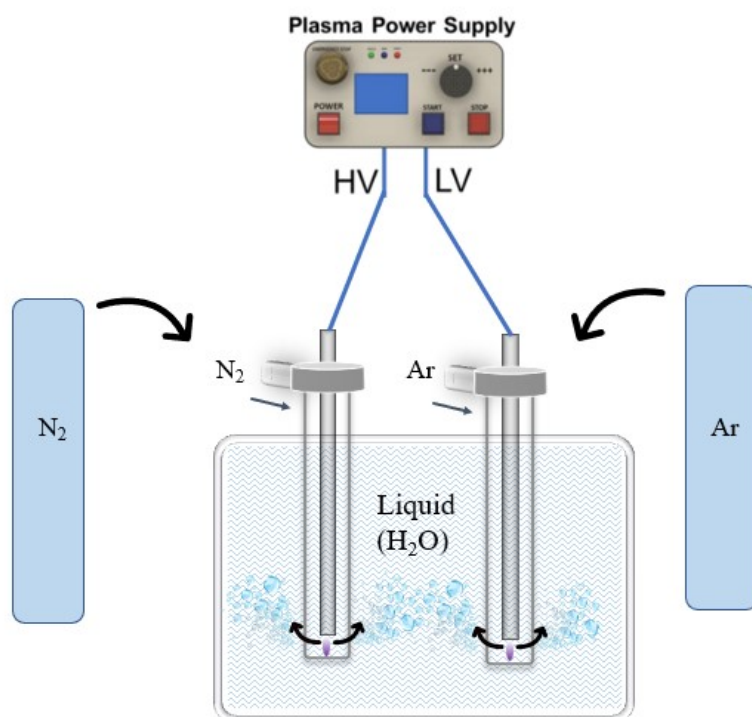

Fig. S6 Discharge plasma platform.

### S3. Detection of RONS in the liquid

Liquid-phase reactive species are assayed according to the manual of the assay kit (Beyotime Biotech). The standard curve of  $\text{H}_2\text{O}_2$  is shown in Fig. S7.

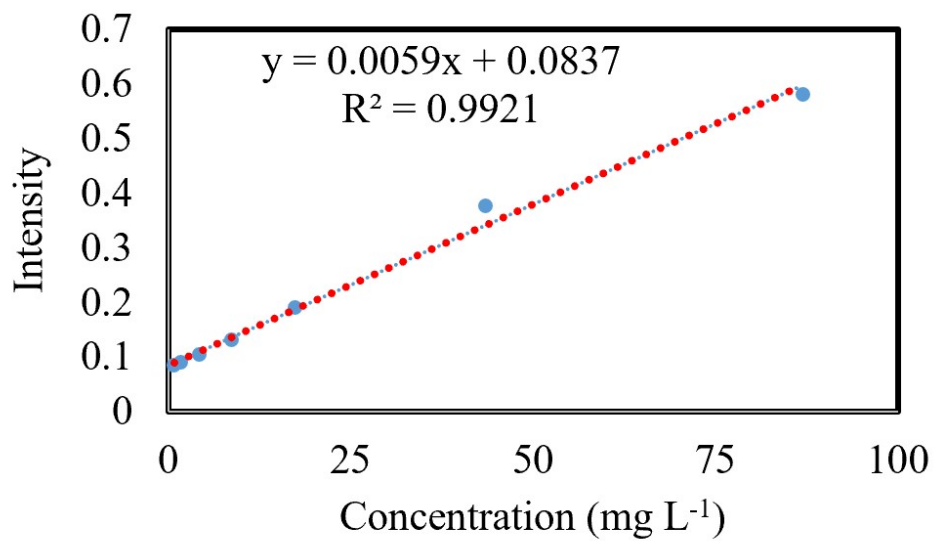

**Fig. S7** The standard curve of  $\text{H}_2\text{O}_2$  concentration



The principle of  $\text{NO}_3^-$  detection is to convert  $\text{NO}_3^-$  to  $\text{NO}_2^-$ , measure the total nitrogen concentration, and subtract the  $\text{NO}_2^-$  concentration. The standard curve of  $\text{NO}_2^-$  and the total nitrogen concentration ( $\text{NO}_2^- + \text{NO}_3^-$ ) are shown in Fig. S8.

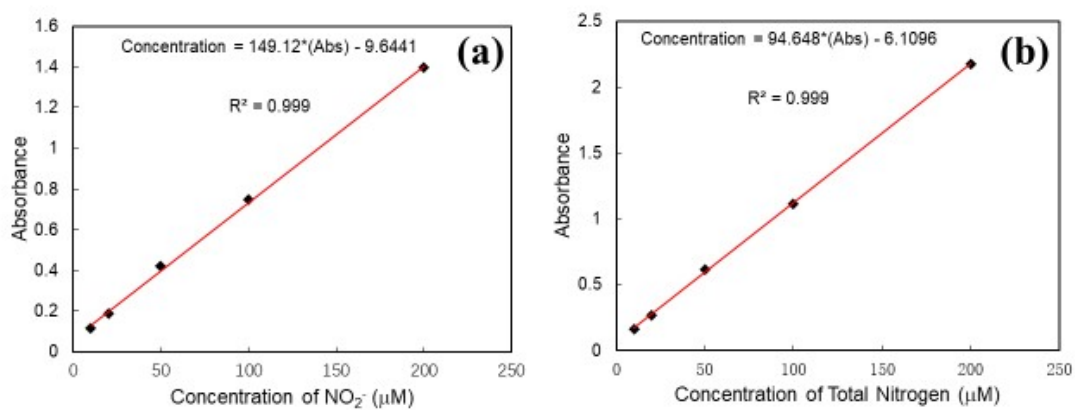

**Fig. S8** The standard curve of (a)  $\text{NO}_2^-$  and (b) total nitrogen concentration

The ONOO<sup>-</sup> concentration was measured by the ESR spectroscopy with the corresponding spin traps, with 1 mM TEMPONE-H for trapping ONOO<sup>-</sup>.

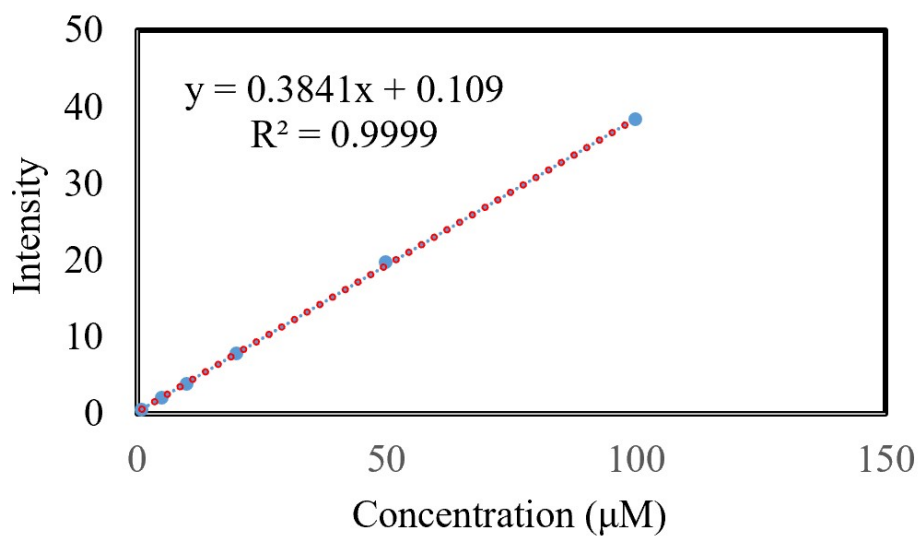

**Fig. S9** The standard curve of ONOO<sup>-</sup> concentration.

S4. Supplementary Figures

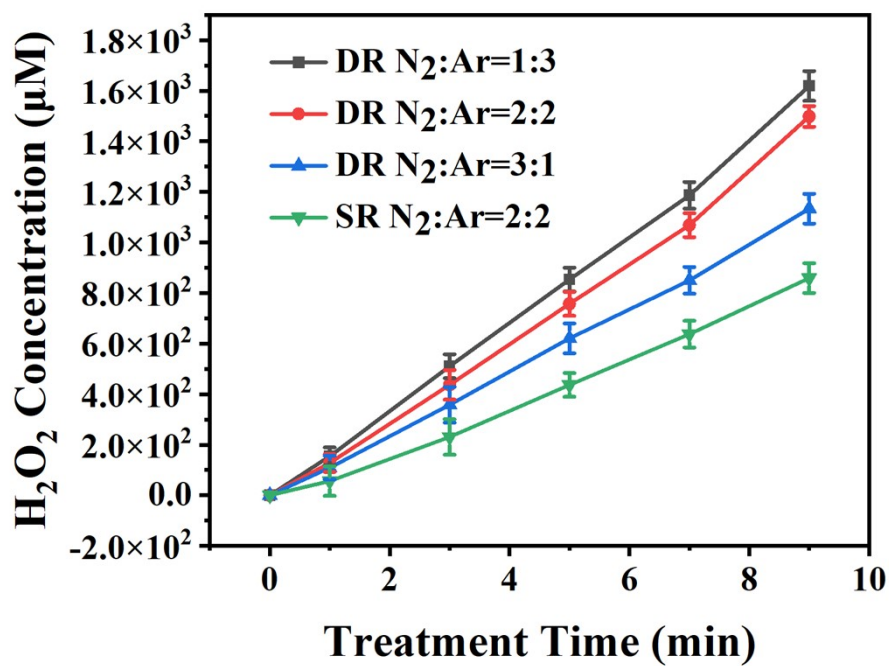

**Fig. S10** The concentration of H<sub>2</sub>O<sub>2</sub> curve of PAW with treatment time at 4 °C.

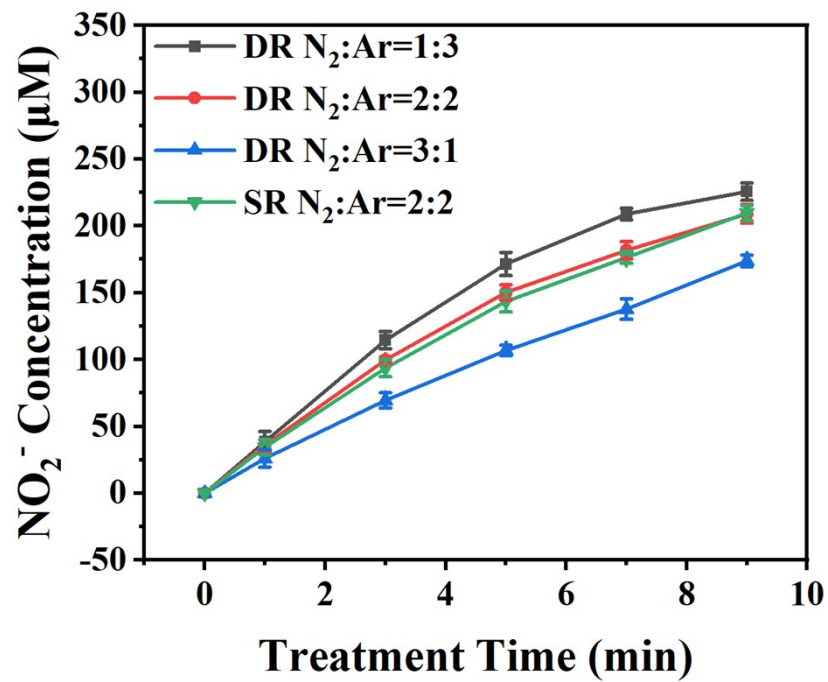

**Fig. S11** The concentration of  $\text{NO}_2^-$  curve of PAW with treatment time at 4 °C.

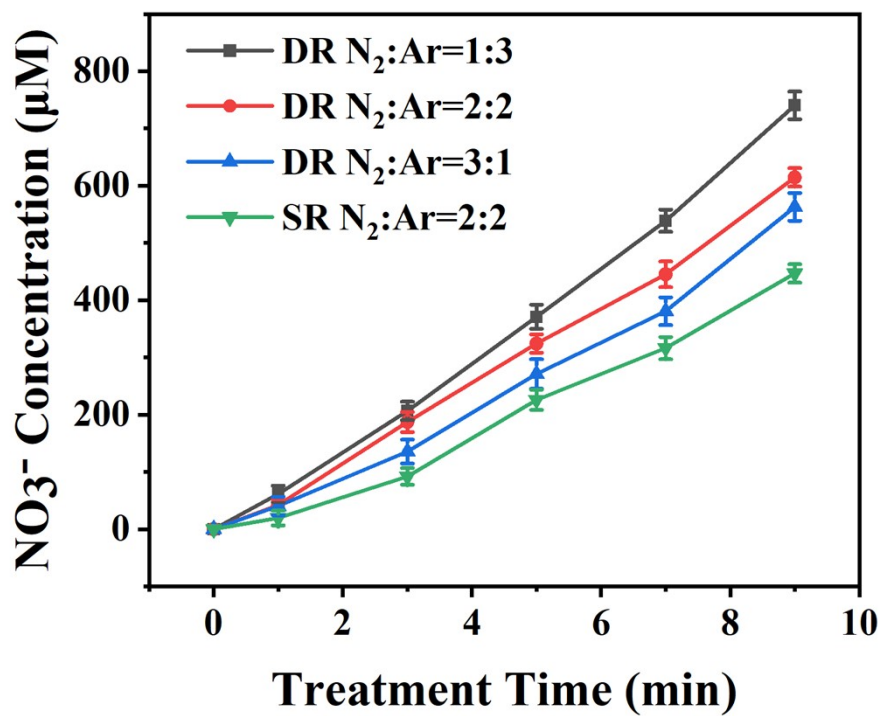

**Fig. S12** The concentration of  $\text{NO}_3^-$  curve of PAW with treatment time at 4 °C.

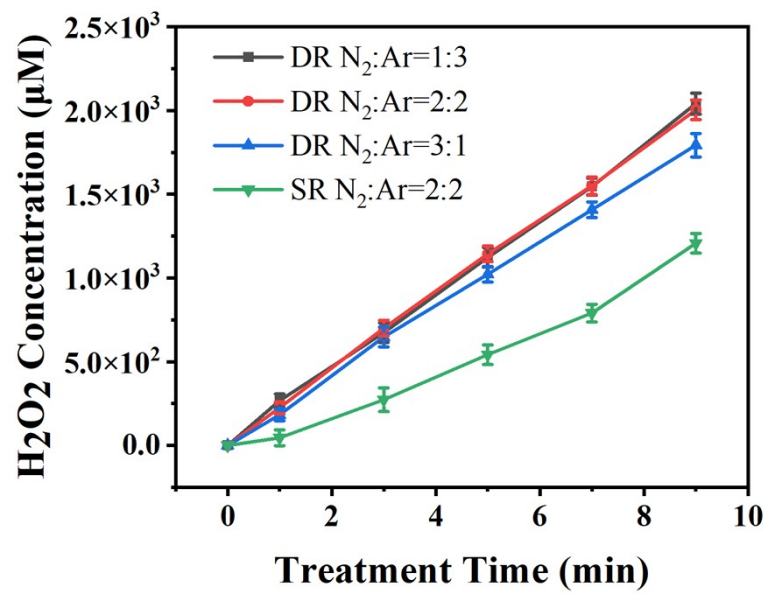

**Fig. S13** The concentration of H<sub>2</sub>O<sub>2</sub> curve of PAW with treatment time at 40 °C.

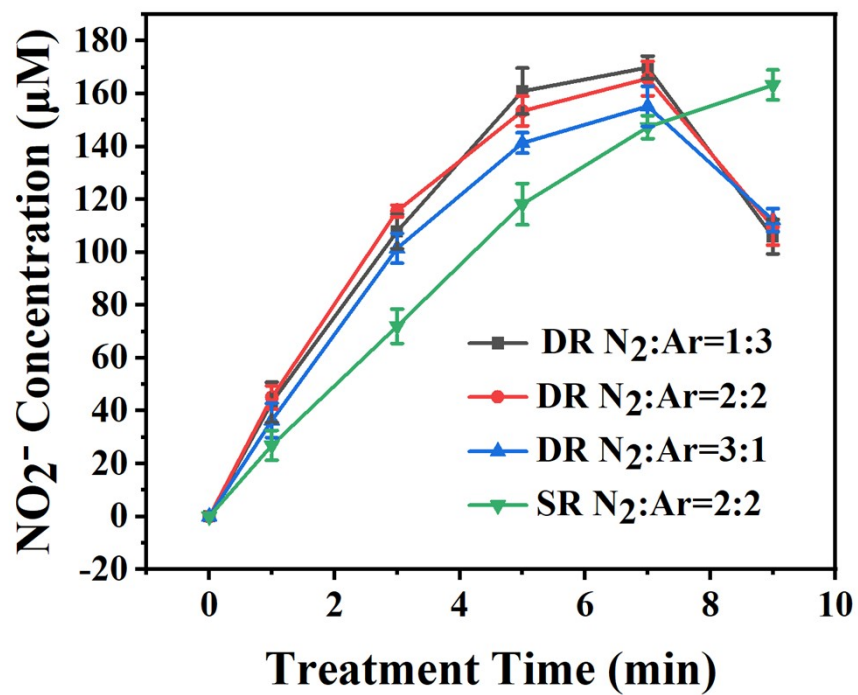

Fig. S14 The concentration of  $\text{NO}_2^-$  curve of PAW with treatment time at 40 °C.

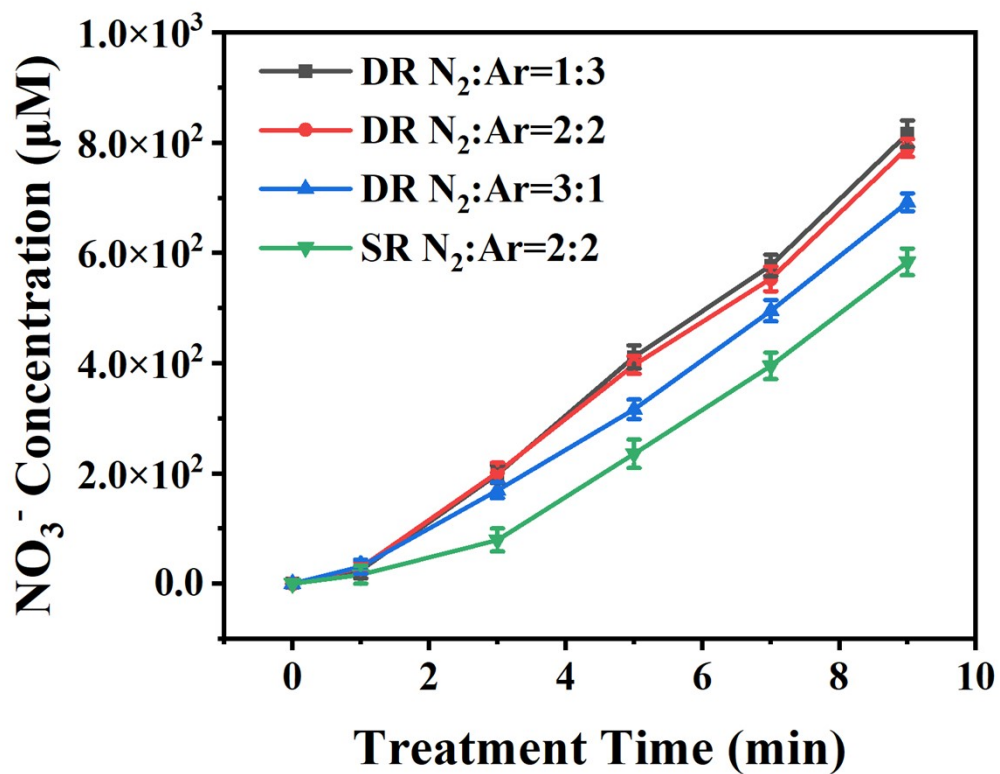

Fig. S15 The concentration of  $\text{NO}_3^-$  curve of PAW with treatment time at 40 °C.



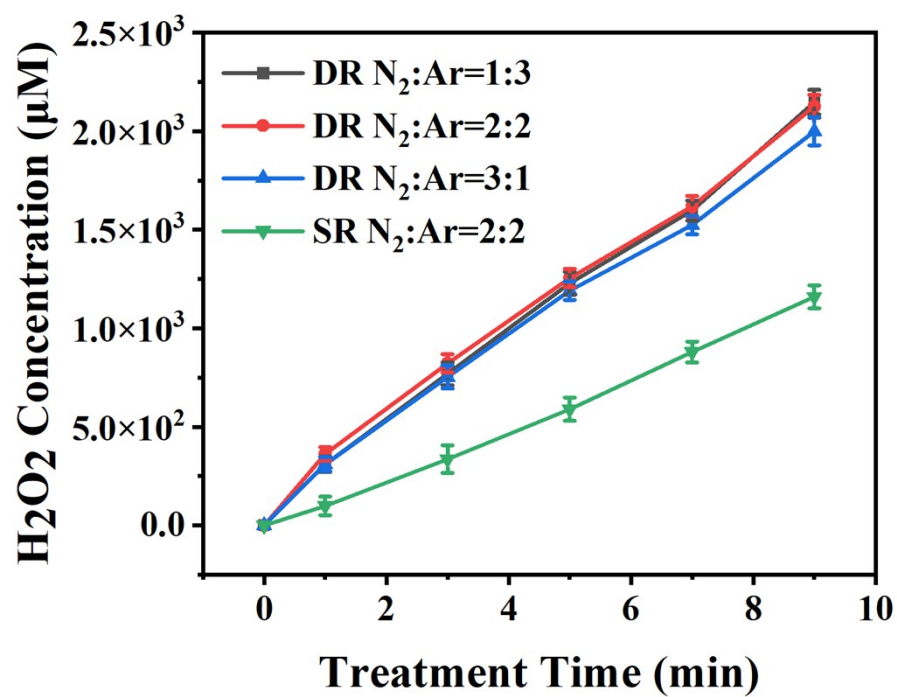

Fig. S16 The concentration of H<sub>2</sub>O<sub>2</sub> curve of PAW with treatment time at 60 °C.

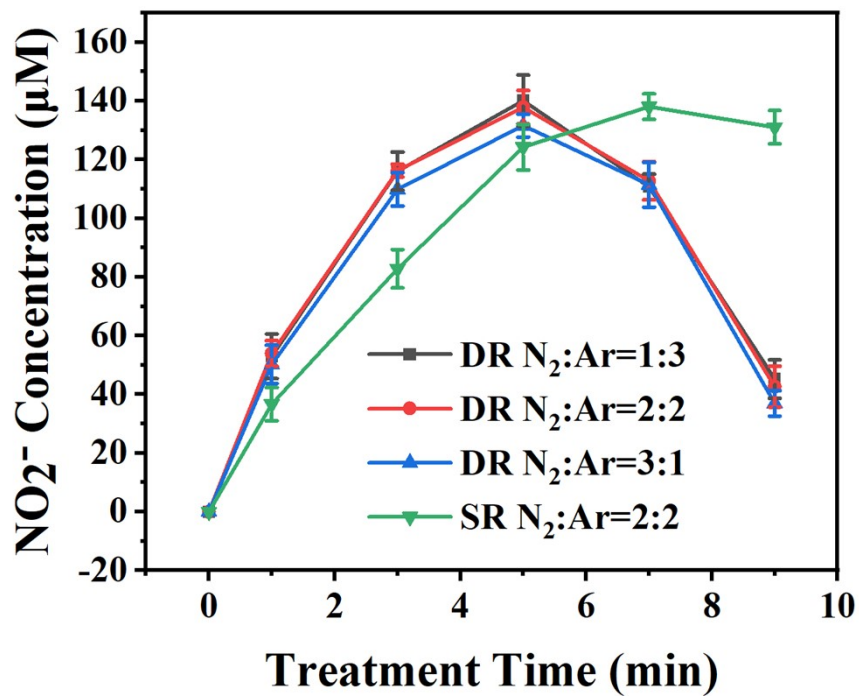

Fig. S17 The concentration of  $\text{NO}_2^-$  curve of PAW with treatment time at 60 °C.

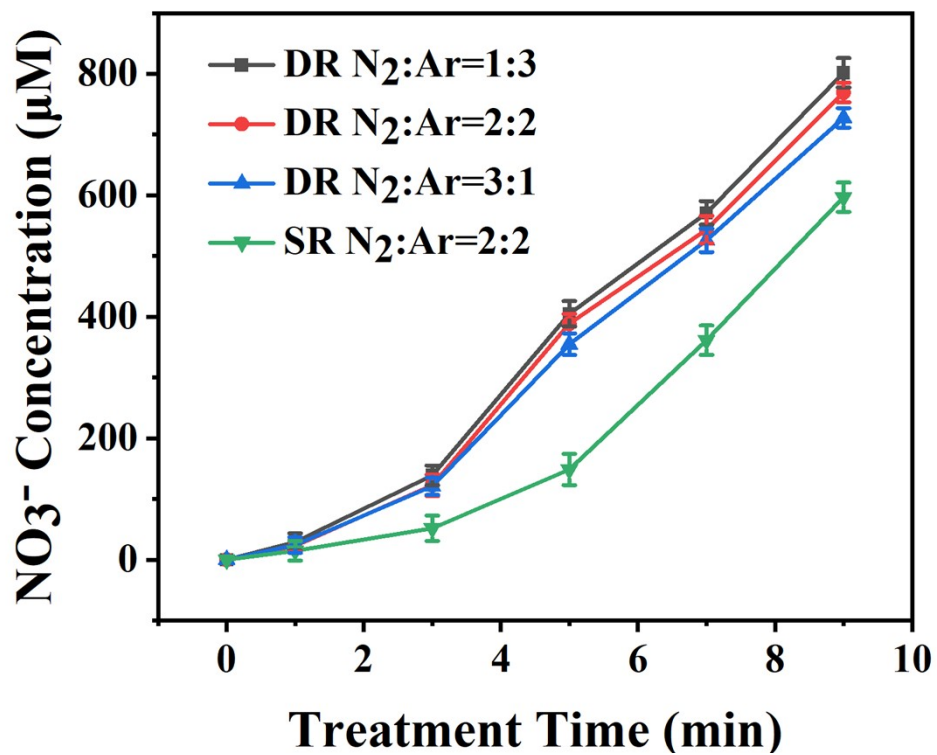

Fig. S18 The concentration of  $\text{NO}_3^-$  curve of PAW with treatment time at  $60^\circ\text{C}$ .

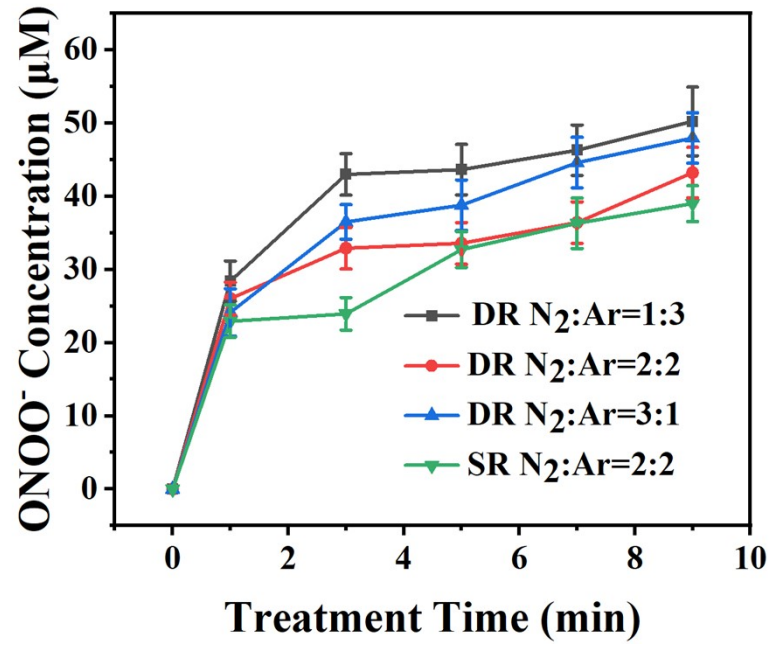

**Fig. S19** The concentration of ONOO<sup>-</sup> curve of PAW with treatment time at 4 °C.

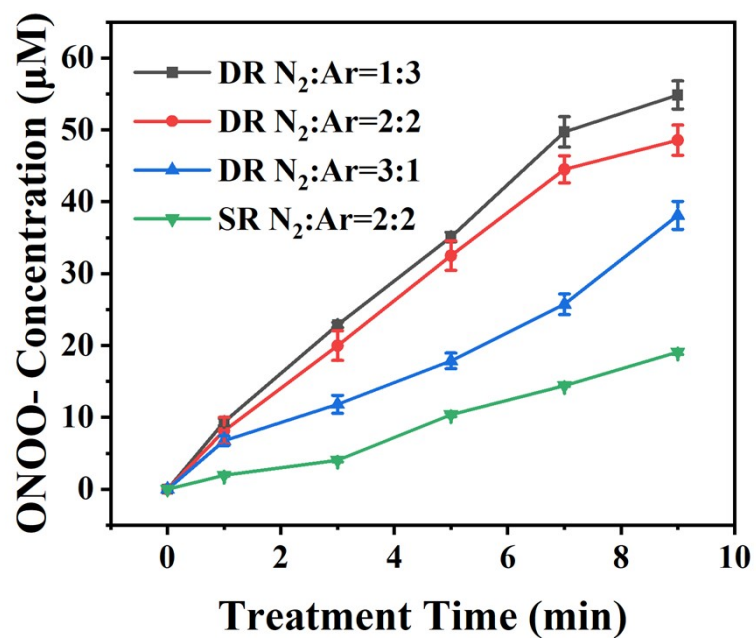

**Fig. S20** The concentration of ONOO<sup>-</sup> curve of PAW with treatment time at 40 °C.

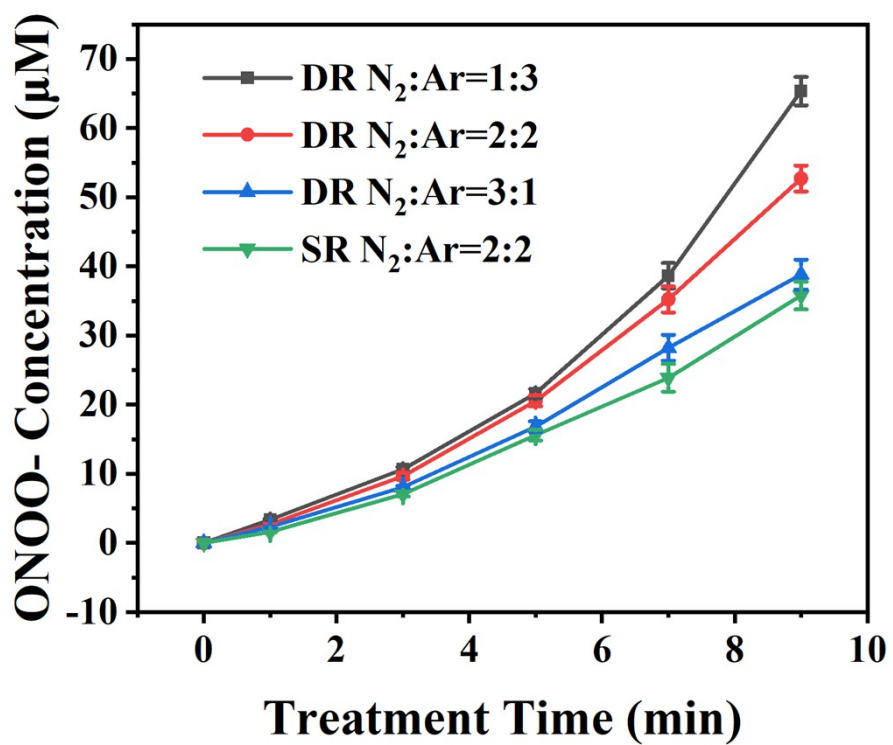

**Fig. S21** The concentration of ONOO<sup>-</sup> curve of PAW with treatment time at 60 °C.

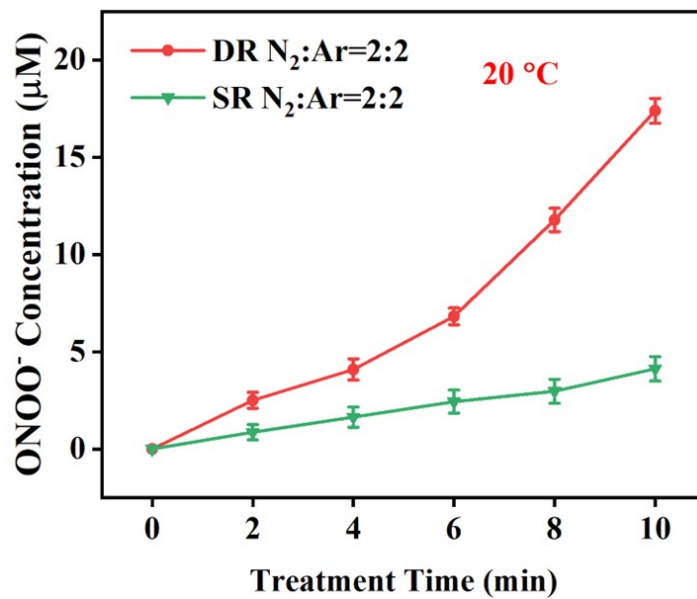

**Fig. S22** The concentration of ONOO<sup>-</sup> curve of SR-PAW and DR-PAW with treatment time at 20 °C.

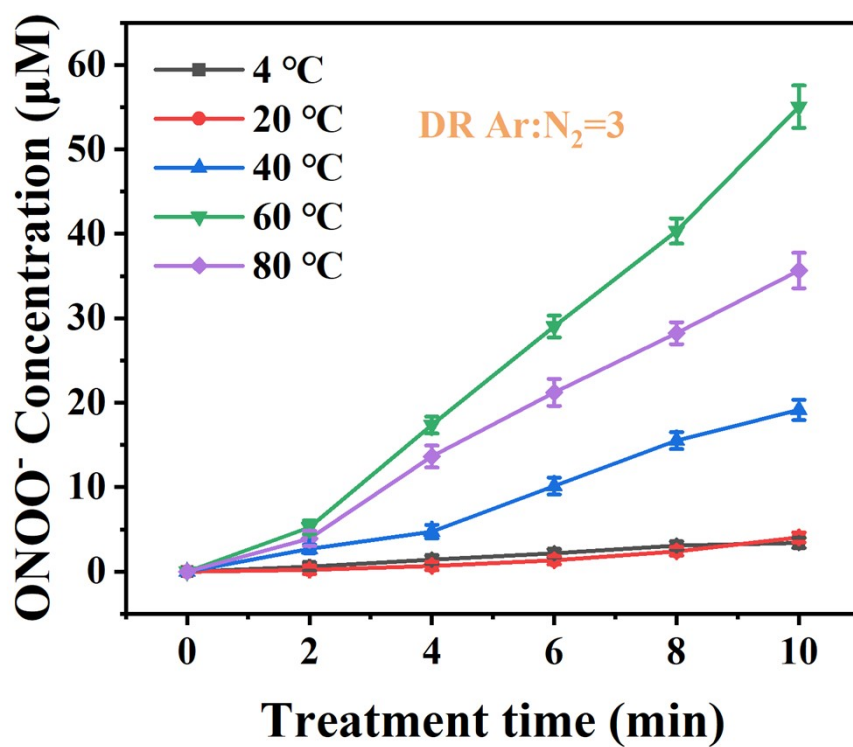

**Fig. S23** The concentration of ONOO<sup>-</sup> curve DR-PAW with treatment time at various temperature.



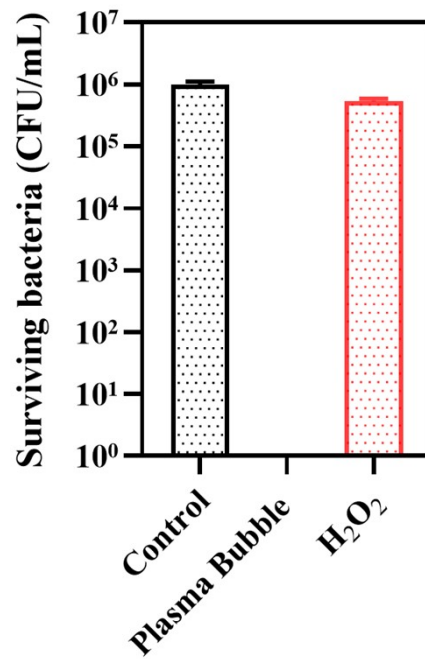

**Fig. S24** Bactericidal effect of PAW produced from the DR system. Control refers to maintaining other conditions (including bacterial concentration, volume, temperature, etc.) but not using plasma treatment; Plasma bubble refers to maintaining other conditions (including bacterial concentration, volume, temperature, etc.) and using plasma treatment H<sub>2</sub>O; H<sub>2</sub>O<sub>2</sub> refers to maintaining other conditions (including bacterial concentration, volume, temperature, etc.), but adding same concentration of H<sub>2</sub>O<sub>2</sub> to the water and not using plasma treatment.
